# Supplementary material for: A nano-catalyst promoting endogenous NO production to enhance chemotherapy efficacy by vascular normalization
Source: Royal Society of Chemistry journal article supplement (doi:10.1039/d2qm00133k), 2022-01-01
Supplement: d2qm00133k1.pdf [file d2qm00133k1.pdf]

## Electronic Supplementary Material

### **A nano-catalyst promoting endogenous NO production enhance chemotherapy efficacy by vascular normalization**

Xiaohui Wang, Xiaoyue Feng, Mengjie Sun, Mingzhu Wang, Wei Wang\* and Zhi  
Yuan\*

Key Laboratory of Functional Polymer Materials, Institute of Polymer Chemistry,  
College of Chemistry, Nankai University, Tianjin 300071, China.

Corresponding Authors:

Wei Wang

Email: [duroo@nankai.edu.cn](mailto:duroo@nankai.edu.cn)

Zhi Yuan

E-mail: [zhiy@nankai.edu.cn](mailto:zhiy@nankai.edu.cn)

## Supporting Figures

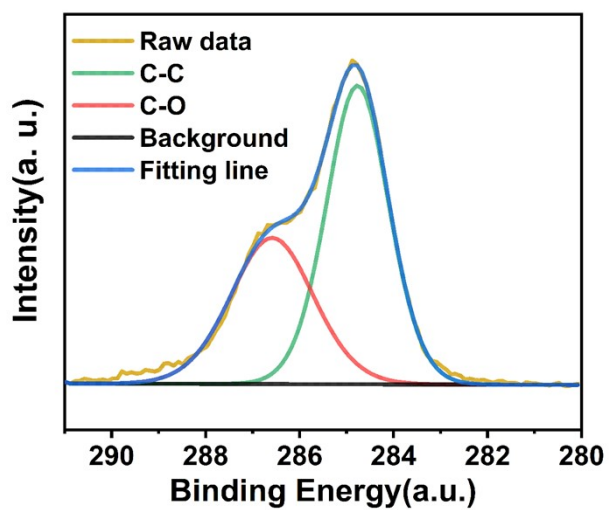

**Fig. S1** C 1s analysis of CuMSN.

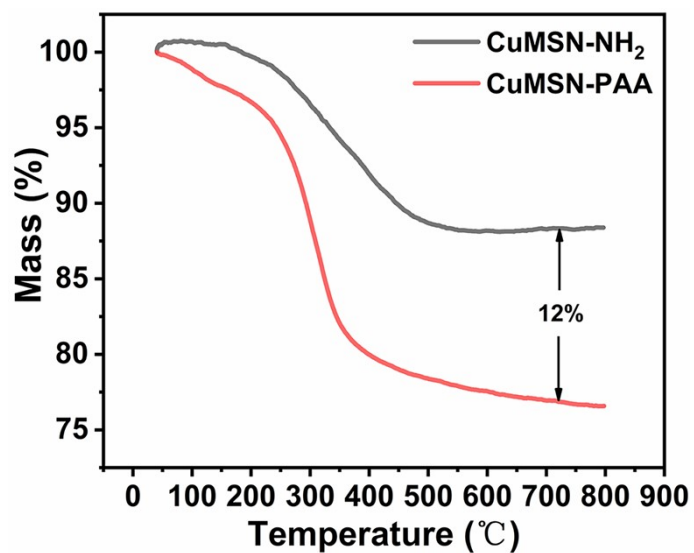

**Fig. S2** TGA curve of CuMSN-NH<sub>2</sub> and CuMSN-PAA.

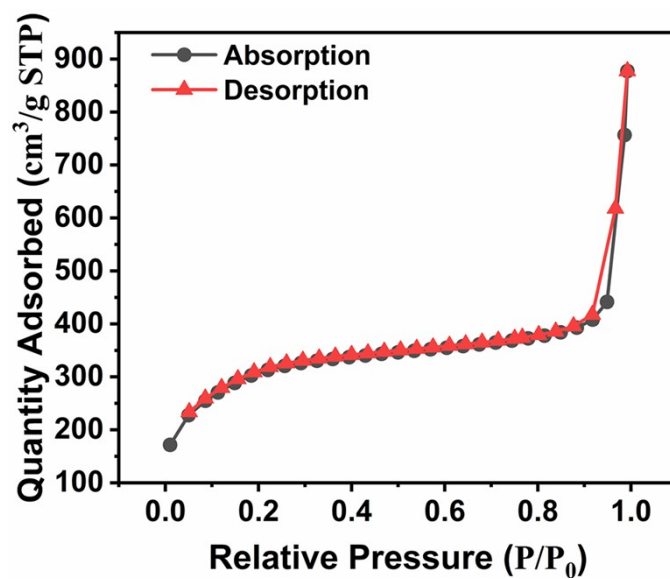

**Fig. S3**  $\text{N}_2$  adsorption-desorption isotherm of CuMSN.

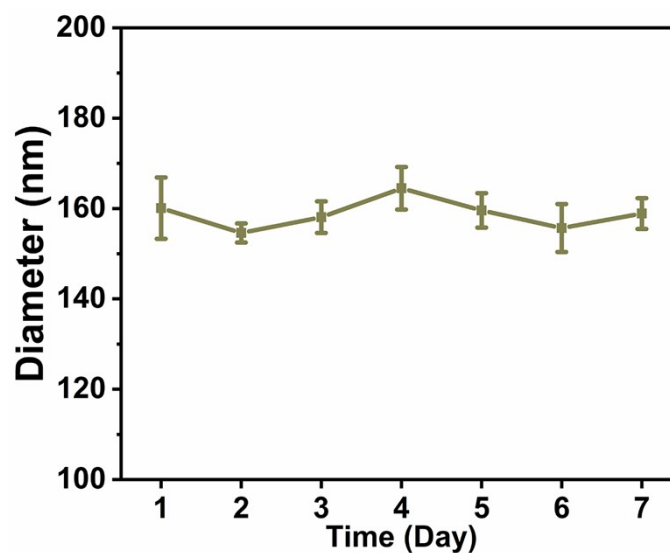

**Fig. S4** Hydrodynamic diameter of CuMSN-PAA in PBS with 10% FBS during a week period.

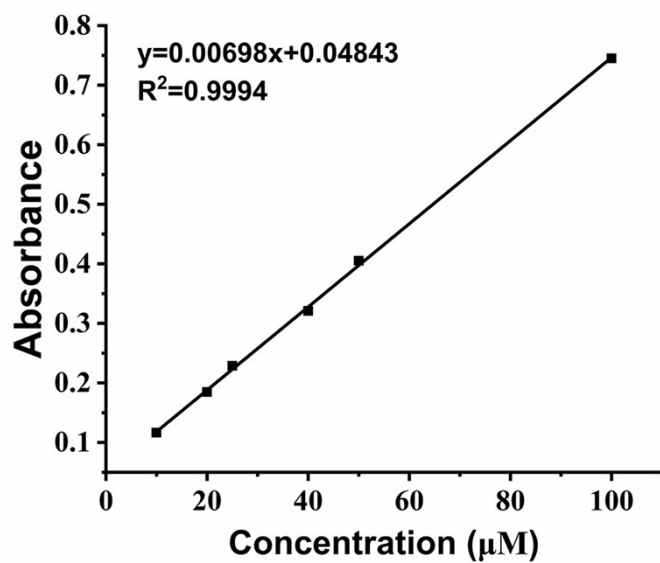

Fig. S5 The standard curve of NaNO<sub>2</sub>-NO.

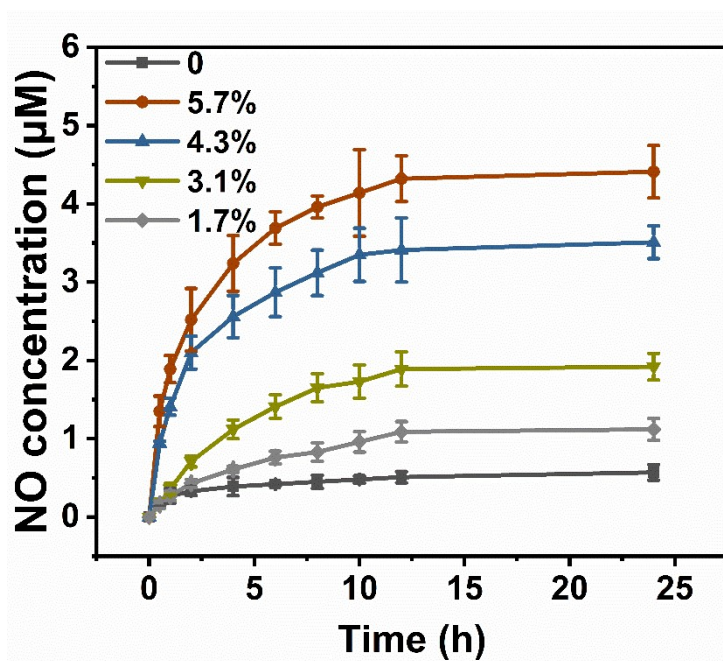

Fig. S6 NO generated by adding CuMSN-PAA in PBS containing 10 µM GSNO at different Cu content.

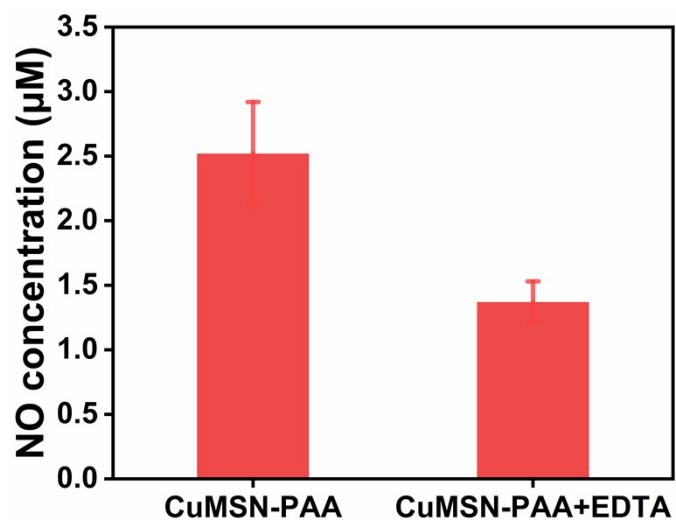

Fig. S7 NO generated from CuMSN-PAA in the presence or absence of EDTA.

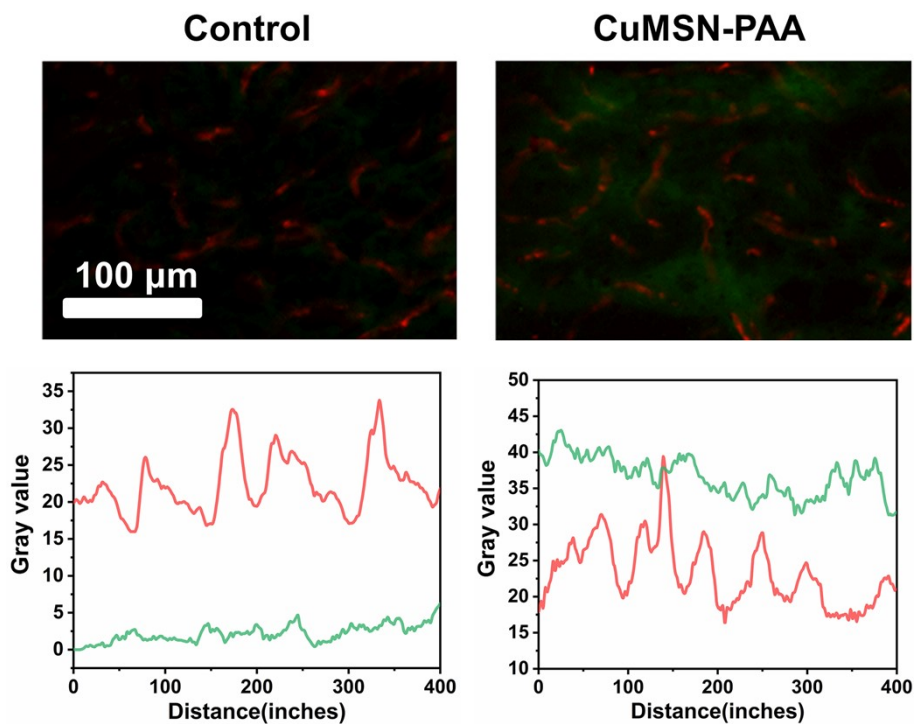

Fig. S8 Representative images showing NO in tumors detected using DAF-FM DA fluorescent probe and corresponding gray value of each image.

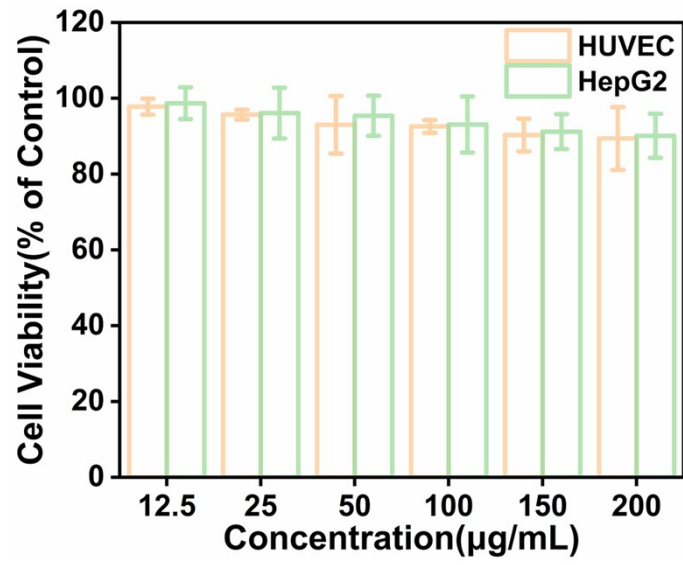

**Fig. S9** Relative viabilities of HepG2 and HUVEC cells after being treated with varied concentrations of CuMSN-PAA (n = 3).
